# Supplementary material for: Combination of Biochar and Trichoderma harzianum Can Improve the Phytoremediation Efficiency of Brassica juncea and the Rhizosphere Micro-Ecology in Cadmium and Arsenic Contaminated Soil
Source: MDPI journal article supplement (doi:10.3390/plants12162939), 2023-08-14
Supplement: s1 [file s1]

## Supplementary Information

### Effects of combined biochar and *Trichoderma harzianum* on improving the cadmium and arsenic phytoremediation efficiency of *Brassica juncea* and the response of the rhizosphere soil micro-ecology

Shaoxiong Yao<sup>a</sup>, Beibei Zhou<sup>a\*</sup>, Manli Duan<sup>a</sup>, Tao Cao<sup>a</sup>, Zhaoquan Wen<sup>a</sup>, Xiaopeng Chen<sup>a</sup>, Hui Wang<sup>a</sup>, Min Wang<sup>a</sup>, Wen Cheng<sup>a</sup>, Hongyan Zhu<sup>a</sup>, Qiang Yang<sup>b</sup>, Yujin Li<sup>b</sup>

<sup>a</sup> State Key Laboratory of Eco-Hydraulics in Northwest Arid Region of China, Xi'an University of Technology, Xi'an 710048, China; 580231.ysx@gmail.com (S.Y.); manli0815@163.com (M.D.); 15102711614@163.com (T.C.); blank4634@163.com (Z.W.); man\_xp@sina.cn (X.C.); wanghui306@xaut.edu.cn (H.W.); wangmin@xaut.edu.cn (M.W.); wencheng@xaut.edu.cn (W.C.); zhy@xaut.edu.cn (H.Z.)

<sup>b</sup> PowerChina Northwest Engineering Corporation Limited, Xi'an 710065, China; yangqiang@nwh.cn (Q.Y.); liyujin@nwh.cn (Y.L.).

\* Corresponding author. E-mail address: happyangle222@aliyun.com (B. B. Zhou)

**Table S1** Soil physicochemical characteristics in the experimental field

**Table S2** Plant shoots and roots biomass (mean  $\pm$  S.E., n=3)

**Table S3** Variation in soil physicochemical properties (pH, EC, CEC, AN, AP, AK, OM) in the inter-root, 15cm, 30cm and 45cm soil layers under different restoration treatments (mean  $\pm$  S.E., n=3)

**Table S4** Rhizosphere soil microbial community  $\alpha$ -diversity index (mean  $\pm$  S.E., n=3)

**Figure S1** Rarefaction curves of bacteria(A) and fungi(B) at the 97% sequence similarity level.

**Figure S2** Heatmap of the 30 most abundant genera for bacteria (A) and fungi (B) across all 6 samples in rhizosphere soil.

**Figure S3** Pearson correlation between rhizosphere soil physicochemical properties, enzyme activity and plant potentially toxic elements accumulation.

**Table S1.** Soil physicochemical characteristics in the experimental field

| Soil parameter                                         | Value                |                       |                       |
|--------------------------------------------------------|----------------------|-----------------------|-----------------------|
|                                                        | 0-15 cm<br>deep soil | 15-30 cm<br>deep soil | 30-45 cm<br>deep soil |
| pH                                                     | 8.33                 | 8.28                  | 8.39                  |
| Organic matter (OM, g kg <sup>-1</sup> )               | 16.03                | 15.32                 | 17.14                 |
| Cation exchange capacity (CEC, cmol kg <sup>-1</sup> ) | 22.55                | 20.65                 | 21.43                 |
| Available nitrogen (AN, mg kg <sup>-1</sup> )          | 40.34                | 45.21                 | 38.75                 |
| Available potassium (AK, mg kg <sup>-1</sup> )         | 140.30               | 130.25                | 105.95                |
| Available phosphorus (AP, mg kg <sup>-1</sup> )        | 3.56                 | 3.12                  | 3.29                  |
| Total Cd (mg kg <sup>-1</sup> )                        | 1.54                 | 1.64                  | 1.30                  |
| Total As (mg kg <sup>-1</sup> )                        | 24.42                | 44.36                 | 46.93                 |
| Total Hg (mg kg <sup>-1</sup> )                        | 5.89                 | 3.57                  | 2.93                  |
| Total Pb (mg kg <sup>-1</sup> )                        | 38.58                | 38.61                 | 35.45                 |
| Total Cu (mg kg <sup>-1</sup> )                        | 43.31                | 42.80                 | 45.28                 |
| Total Cr (mg kg <sup>-1</sup> )                        | 209.59               | 194.51                | 233.37                |

**Table S2.** Biochar physicochemical characteristics in this experimental

|         | pH   | Diameter<br>(mm) | Water<br>content<br>(%) | Ash<br>content<br>(%) | Total<br>nitrogen<br>(g kg <sup>-1</sup> ) | Total<br>phosphorus<br>(g kg <sup>-1</sup> ) | Total<br>potassium<br>(g kg <sup>-1</sup> ) |
|---------|------|------------------|-------------------------|-----------------------|--------------------------------------------|----------------------------------------------|---------------------------------------------|
| Biochar | 7.23 | 1                | 1.02                    | 4.4                   | 7.32                                       | 3.24                                         | 17.06                                       |

**Table S3.** Plant shoots and roots biomass (mean  $\pm$  S.E., n=3)

| Treatment | Shoots biomass     | Roots biomass      | Chlorophyll a     | Chlorophyll b     | Total chlorophyll |
|-----------|--------------------|--------------------|-------------------|-------------------|-------------------|
| CK        | 0.588 $\pm$ 0.024f | 0.064 $\pm$ 0.005f | 0.633 $\pm$ 0.05d | 0.482 $\pm$ 0.04d | 1.111 $\pm$ 0.06b |
| B         | 1.784 $\pm$ 0.069b | 0.110 $\pm$ 0.004d | 0.757 $\pm$ 0.04c | 0.356 $\pm$ 0.02e | 1.109 $\pm$ 0.04b |
| T1        | 0.818 $\pm$ 0.031e | 0.153 $\pm$ 0.006b | 1.239 $\pm$ 0.09a | 1.081 $\pm$ 0.05a | 1.155 $\pm$ 0.06b |
| T2        | 1.038 $\pm$ 0.060d | 0.075 $\pm$ 0.005e | 0.755 $\pm$ 0.03c | 0.395 $\pm$ 0.02e | 1.146 $\pm$ 0.04b |
| T1B       | 1.328 $\pm$ 0.049c | 0.130 $\pm$ 0.005c | 0.645 $\pm$ 0.04d | 0.925 $\pm$ 0.05b | 1.563 $\pm$ 0.08a |
| T2B       | 2.012 $\pm$ 0.138a | 0.183 $\pm$ 0.012a | 0.869 $\pm$ 0.05b | 0.817 $\pm$ 0.05c | 1.680 $\pm$ 0.12a |

CK, *Brassica juncea* alone; B, *Brassica juncea* + biochar; T1, *Brassica juncea* + 4.5 g m<sup>-2</sup> TH; T2, *Brassica juncea* + 9 g m<sup>-2</sup> TH; T1B, *Brassica juncea* + biochar + 4.5 g m<sup>-2</sup> TH; T2B, *Brassica juncea* + biochar + 9 g m<sup>-2</sup> TH. Different letters in each column represent significant differences at  $p < 0.05$ .

**Table S4.** Variation in soil physicochemical properties (pH, EC, CEC, AN, AP, AK, OM) in the inter-root, 15cm, 30cm and 45cm soil layers under different restoration treatments (mean  $\pm$  S.E., n=3)

| Hierarchical processing | pH               | EC<br>(mS cm <sup>-1</sup> ) | CEC<br>(cmol kg <sup>-1</sup> ) | AN<br>(mg kg <sup>-1</sup> ) | AP<br>(mg kg <sup>-1</sup> ) | AK<br>(mg kg <sup>-1</sup> ) | OM<br>(g kg <sup>-1</sup> ) |
|-------------------------|------------------|------------------------------|---------------------------------|------------------------------|------------------------------|------------------------------|-----------------------------|
| Rhizosphere soil        |                  |                              |                                 |                              |                              |                              |                             |
| CK                      | 8.32 $\pm$ 0.38a | 84.64 $\pm$ 5.31b            | 27.30 $\pm$ 1.38d               | 40.42 $\pm$ 2.97c            | 7.38 $\pm$ 0.27d             | 46.44 $\pm$ 2.15d            | 21.61 $\pm$ 0.85c           |
| B                       | 8.35 $\pm$ 0.39a | 89.08 $\pm$ 5.43b            | 34.43 $\pm$ 1.73c               | 44.62 $\pm$ 2.46b            | 14.74 $\pm$ 0.56b            | 106.59 $\pm$ 5.31a           | 23.32 $\pm$ 0.85b           |
| T1                      | 8.32 $\pm$ 0.41a | 78.88 $\pm$ 5.12c            | 29.51 $\pm$ 1.57d               | 33.34 $\pm$ 1.98d            | 8.24 $\pm$ 0.31d             | 60.63 $\pm$ 2.78c            | 13.91 $\pm$ 0.55            |
| T2                      | 8.20 $\pm$ 0.39a | 76.86 $\pm$ 4.89c            | 37.53 $\pm$ 1.91b               | 42.18 $\pm$ 2.52bc           | 11.86 $\pm$ 0.47c            | 66.46 $\pm$ 3.18c            | 20.49 $\pm$ 0.76c           |
| T1B                     | 8.26 $\pm$ 0.40a | 136.65 $\pm$ 8.88a           | 38.94 $\pm$ 2.08b               | 55.35 $\pm$ 3.14a            | 15.14 $\pm$ 1.00b            | 79.17 $\pm$ 3.88b            | 23.94 $\pm$ 0.85b           |
| T2B                     | 8.04 $\pm$ 0.40a | 85.65 $\pm$ 5.53b            | 48.70 $\pm$ 2.55a               | 51.07 $\pm$ 2.98a            | 23.05 $\pm$ 0.49a            | 103.26 $\pm$ 4.77a           | 30.17 $\pm$ 0.76a           |
| 0-15cm deep soil        |                  |                              |                                 |                              |                              |                              |                             |
| CK                      | 8.67 $\pm$ 0.39a | 78.65 $\pm$ 5.10bc           | 26.82 $\pm$ 1.42d               | 39.51 $\pm$ 3.56d            | 5.39 $\pm$ 0.21d             | 44.02 $\pm$ 2.08d            | 18.04 $\pm$ 0.69d           |
| B                       | 8.70 $\pm$ 0.42a | 82.22 $\pm$ 5.16b            | 34.33 $\pm$ 1.72b               | 43.21 $\pm$ 2.57c            | 4.98 $\pm$ 0.18e             | 53.02 $\pm$ 2.63b            | 22.08 $\pm$ 0.84b           |
| T1                      | 8.67 $\pm$ 0.41a | 81.00 $\pm$ 5.10b            | 30.43 $\pm$ 1.65c               | 42.50 $\pm$ 2.46c            | 5.46 $\pm$ 0.21d             | 46.56 $\pm$ 2.23d            | 17.09 $\pm$ 0.68d           |
| T2                      | 8.54 $\pm$ 0.42a | 74.06 $\pm$ 4.58c            | 30.72 $\pm$ 1.62c               | 49.59 $\pm$ 2.78b            | 6.14 $\pm$ 0.23c             | 48.53 $\pm$ 2.33c            | 20.13 $\pm$ 0.77c           |
| T1B                     | 8.60 $\pm$ 0.41a | 96.40 $\pm$ 5.93a            | 36.42 $\pm$ 1.92b               | 57.38 $\pm$ 3.21a            | 6.83 $\pm$ 0.25b             | 62.87 $\pm$ 2.98a            | 19.96 $\pm$ 0.71c           |
| T2B                     | 8.38 $\pm$ 0.38a | 78.75 $\pm$ 5.01bc           | 42.85 $\pm$ 2.15a               | 46.75 $\pm$ 2.77b            | 7.49 $\pm$ 0.19a             | 63.33 $\pm$ 3.02a            | 27.80 $\pm$ 0.69a           |
| 15-30cm deep soil       |                  |                              |                                 |                              |                              |                              |                             |
| CK                      | 8.69 $\pm$ 0.42a | 77.10 $\pm$ 4.97c            | 28.73 $\pm$ 1.53c               | 65.21 $\pm$ 3.86a            | 0.82 $\pm$ 0.03e             | 34.78 $\pm$ 1.63d            | 14.88 $\pm$ 0.56c           |
| B                       | 8.64 $\pm$ 0.43a | 80.60 $\pm$ 4.94b            | 35.71 $\pm$ 1.90b               | 43.92 $\pm$ 2.52c            | 2.58 $\pm$ 0.10c             | 21.55 $\pm$ 1.08e            | 21.77 $\pm$ 0.78a           |
| T1                      | 8.74 $\pm$ 0.41a | 79.40 $\pm$ 4.84bc           | 24.51 $\pm$ 1.27d               | 27.77 $\pm$ 1.66d            | 1.52 $\pm$ 0.06d             | 49.26 $\pm$ 2.33b            | 18.10 $\pm$ 0.71b           |
| T2                      | 8.59 $\pm$ 0.40a | 72.60 $\pm$ 4.68d            | 22.39 $\pm$ 1.13d               | 39.18 $\pm$ 2.34cd           | 2.69 $\pm$ 0.09c             | 40.46 $\pm$ 1.99c            | 17.04 $\pm$ 0.60b           |
| T1B                     | 8.77 $\pm$ 0.40a | 94.50 $\pm$ 6.08a            | 38.77 $\pm$ 2.09a               | 49.57 $\pm$ 2.82b            | 3.23 $\pm$ 0.13b             | 65.26 $\pm$ 3.13a            | 13.41 $\pm$ 0.52d           |
| T2B                     | 8.73 $\pm$ 0.42a | 77.20 $\pm$ 4.87c            | 33.34 $\pm$ 1.73bc              | 42.86 $\pm$ 2.51c            | 4.96 $\pm$ 0.04a             | 47.61 $\pm$ 2.23b            | 13.95 $\pm$ 0.51d           |
| 30-45cm deep soil       |                  |                              |                                 |                              |                              |                              |                             |
| CK                      | 8.71 $\pm$ 0.40a | 81.10 $\pm$ 5.08bc           | 26.74 $\pm$ 1.41c               | 47.07 $\pm$ 2.72a            | 1.60 $\pm$ 0.06f             | 34.74 $\pm$ 1.73c            | 10.19 $\pm$ 0.39c           |
| B                       | 8.73 $\pm$ 0.41a | 78.20 $\pm$ 5.05cd           | 30.47 $\pm$ 1.64b               | 28.88 $\pm$ 1.06d            | 6.44 $\pm$ 0.25c             | 34.53 $\pm$ 1.62c            | 16.93 $\pm$ 0.67a           |
| T1                      | 8.64 $\pm$ 0.41a | 87.60 $\pm$ 5.41a            | 21.04 $\pm$ 1.13de              | 25.31 $\pm$ 1.50e            | 3.04 $\pm$ 0.12e             | 39.78 $\pm$ 1.81bc           | 14.72 $\pm$ 0.58b           |
| T2                      | 8.63 $\pm$ 0.41a | 73.10 $\pm$ 4.56d            | 19.36 $\pm$ 0.99e               | 34.39 $\pm$ 2.01bc           | 9.31 $\pm$ 0.35a             | 21.47 $\pm$ 1.03e            | 9.13 $\pm$ 0.35d            |
| T1B                     | 8.89 $\pm$ 0.43a | 84.00 $\pm$ 5.37bc           | 40.84 $\pm$ 2.17a               | 32.57 $\pm$ 1.79c            | 7.12 $\pm$ 0.28b             | 44.21 $\pm$ 2.01b            | 15.93 $\pm$ 0.62ab          |
| T2B                     | 8.72 $\pm$ 0.42a | 85.60 $\pm$ 5.17b            | 22.63 $\pm$ 1.24d               | 37.19 $\pm$ 2.23b            | 3.52 $\pm$ 0.13d             | 67.81 $\pm$ 3.07a            | 13.95 $\pm$ 0.55b           |

CK, *Brassica juncea* alone; B, *Brassica juncea* + biochar; T1, *Brassica juncea* + 4.5 g m<sup>-2</sup> TH; T2, *Brassica juncea* + 9 g m<sup>-2</sup> TH; T1B, *Brassica juncea* + biochar + 4.5 g m<sup>-2</sup> TH; T2B, *Brassica juncea* + biochar + 9 g m<sup>-2</sup> TH. EC, Electric Conductivity; CEC, Cation Exchange Capacity; OM, Organic Matter; AN, Available Nitrogen; AP, Available Phosphorus; AK, Available Potassium. Different letters in each column represent significant differences at p < 0.05.

**Table S5.** Rhizosphere soil microbial community  $\alpha$ -diversity index (mean  $\pm$  S.E., n=3)

| Treatment | Observed species | Shannon     | Simpson     | Chao1          | ACE            | Goods coverage | PD-whole-tree |
|-----------|------------------|-------------|-------------|----------------|----------------|----------------|---------------|
| Bacteria  |                  |             |             |                |                |                |               |
| CK        | 2490 $\pm$       | 9.070 $\pm$ | 0.993 $\pm$ | 3313.583 $\pm$ | 3365.046 $\pm$ | 0.965 $\pm$    | 323.551 $\pm$ |
|           | 92.709c          | 0.336a      | 0.049a      | 194.327b       | 161.326bc      | 0.062a         | 16.963c       |
| B         | 2366 $\pm$       | 9.183 $\pm$ | 0.996 $\pm$ | 2930.816 $\pm$ | 3023.597 $\pm$ | 0.971 $\pm$    | 306.412 $\pm$ |
|           | 148.235c         | 0.553a      | 0.065a      | 128.822c       | 137.712d       | 0.034a         | 16.535cd      |
| T1        | 2434 $\pm$       | 9.183 $\pm$ | 0.994 $\pm$ | 3124.490 $\pm$ | 3279.747 $\pm$ | 0.967 $\pm$    | 342.666 $\pm$ |
|           | 123.818c         | 0.343a      | 0.034a      | 174.937bc      | 234.435cd      | 0.060a         | 23.421c       |
| T2        | 1892 $\pm$       | 6.621 $\pm$ | 0.912 $\pm$ | 2365.789 $\pm$ | 2550.353 $\pm$ | 0.974 $\pm$    | 262.356 $\pm$ |
|           | 105.922d         | 0.253b      | 0.055a      | 164.826d       | 138.612e       | 0.035a         | 15.770d       |
| T1B       | 2899 $\pm$       | 9.443 $\pm$ | 0.993 $\pm$ | 3355.163 $\pm$ | 3705.366 $\pm$ | 0.965 $\pm$    | 442.681 $\pm$ |
|           | 141.802b         | 0.416a      | 0.056a      | 167.028b       | 197.736b       | 0.040a         | 24.523b       |
| T2B       | 3207 $\pm$       | 9.250 $\pm$ | 0.989 $\pm$ | 4302.027 $\pm$ | 4196.474 $\pm$ | 0.955 $\pm$    | 591.809 $\pm$ |
|           | 107.960a         | 0.514a      | 0.050a      | 265.718a       | 165.109a       | 0.054a         | 38.150a       |
| Fungi     |                  |             |             |                |                |                |               |
| CK        | 977 $\pm$        | 5.951 $\pm$ | 0.96 $\pm$  | 1407.519 $\pm$ | 1446.18 $\pm$  | 0.991 $\pm$    | 390.32 $\pm$  |
|           | 53.936c          | 5.930c      | 0.040a      | 82.801d        | 95.511d        | 0.053a         | 24.605d       |
| B         | 1522 $\pm$       | 7.972 $\pm$ | 0.985 $\pm$ | 1636.026 $\pm$ | 1663.018 $\pm$ | 0.994 $\pm$    | 318.426 $\pm$ |
|           | 76.308b          | 7.920a      | 0.042a      | 72.708c        | 88.360c        | 0.071a         | 16.752e       |
| T1        | 1723 $\pm$       | 6.977 $\pm$ | 0.972 $\pm$ | 2416.004 $\pm$ | 2454.153 $\pm$ | 0.985 $\pm$    | 694.784 $\pm$ |
|           | 109.675a         | 6.920b      | 0.043a      | 128.179a       | 92.410a        | 0.043a         | 27.735a       |
| T2        | 1057 $\pm$       | 4.887 $\pm$ | 0.812 $\pm$ | 1493.269 $\pm$ | 1541.528 $\pm$ | 0.990 $\pm$    | 592.475 $\pm$ |
|           | 73.675c          | 4.750d      | 0.027b      | 94.834cd       | 109.101cd      | 0.031a         | 34.276b       |
| T1B       | 1781 $\pm$       | 7.467 $\pm$ | 0.982 $\pm$ | 2226.385 $\pm$ | 2241.586 $\pm$ | 0.988 $\pm$    | 514.816 $\pm$ |
|           | 63.120a          | 7.400ab     | 0.037a      | 101.562b       | 118.568b       | 0.049a         | 19.266c       |
| T2B       | 785 $\pm$        | 5.210 $\pm$ | 0.911 $\pm$ | 1050.044 $\pm$ | 1093.037 $\pm$ | 0.994 $\pm$    | 364.141 $\pm$ |
|           | 46.695d          | 5.160d      | 0.062a      | 69.136e        | 51.324e        | 0.062a         | 22.792de      |

CK, *Brassica juncea* alone; B, *Brassica juncea* + biochar; T1, *Brassica juncea* + 4.5 g m<sup>-2</sup> TH; T2, *Brassica juncea* + 9 g m<sup>-2</sup> TH; T1B, *Brassica juncea* + biochar + 4.5 g m<sup>-2</sup> TH; T2B, *Brassica juncea* + biochar + 9 g m<sup>-2</sup> TH. Different letters in each column represent significant differences at  $p < 0.05$ .

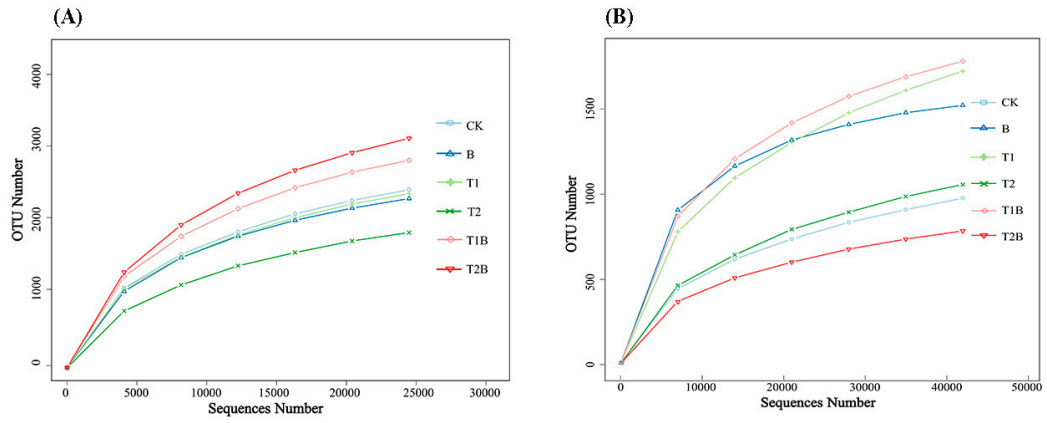

**Figure S1.** Rarefaction curves of bacteria(A) and fungi(B) at the 97% sequence similarity level. CK, *Brassica juncea* alone; B, *Brassica juncea* + biochar; T1, *Brassica juncea* + 4.5 g m<sup>-2</sup> TH; T2, *Brassica juncea* + 9 g m<sup>-2</sup> TH; T1B, *Brassica juncea* + biochar + 4.5 g m<sup>-2</sup> TH; T2B, *Brassica juncea* + biochar + 9 g m<sup>-2</sup> TH.



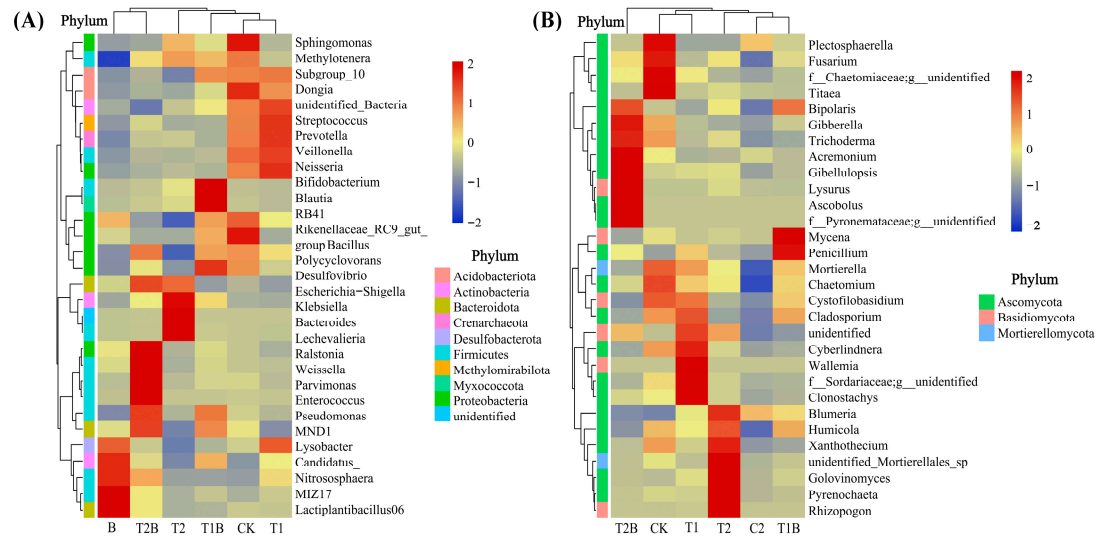

**Figure S2.** Heatmap of the 30 most abundant genera for bacteria (A) and fungi (B) across all 6 samples in rhizosphere soil. CK, *Brassica juncea* alone; B, *Brassica juncea* + biochar; T1, *Brassica juncea* + 4.5 g m<sup>-2</sup> TH; T2, *Brassica juncea* + 9 g m<sup>-2</sup> TH; T1B, *Brassica juncea* + biochar + 4.5 g m<sup>-2</sup> TH; T2B, *Brassica juncea* + biochar + 9 g m<sup>-2</sup> TH. Abundance is expressed as color intensity, reflecting the proportion of the total number of valid sequences in each group. Vertical: treatment; Horizontal: annotation information for species.

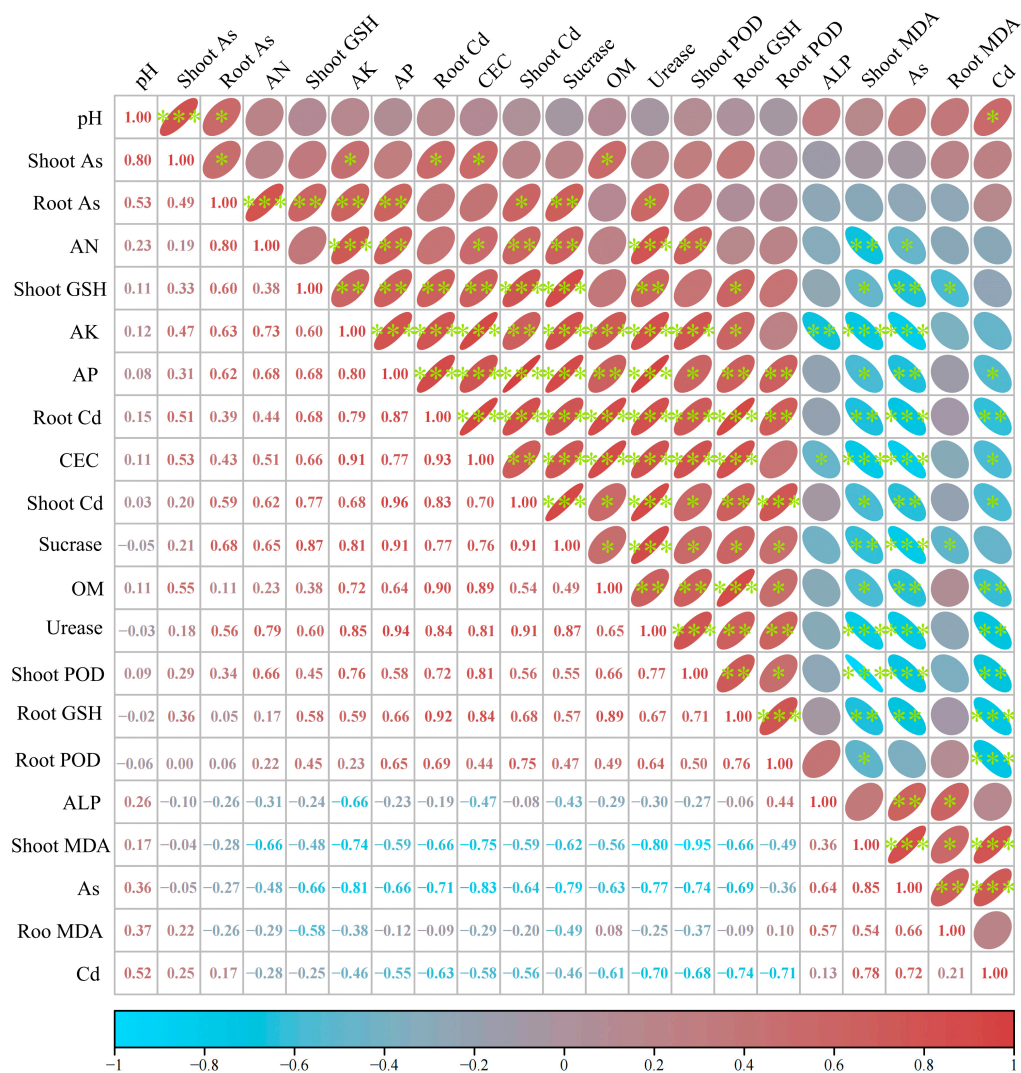

**Figure S3.** Pearson correlation between rhizosphere soil physicochemical properties, enzyme activity and plant heavy metal accumulation. The number represents the correlation coefficient between the parameters. Blue shows a negative correlation and red shows a positive correlation. \* indicates  $0.01 < p \leq 0.05$ , \*\* indicates  $0.001 < p \leq 0.01$ , \*\*\* indicates  $p \leq 0.001$ .
